1 A neonatal ward strengthening program improves survival for neonates treated with CPAP at  
2 district hospitals in Malawi

3

4 Jennifer Carns<sup>1,2</sup>; Sara Liaghati-Mobarhan<sup>1</sup>; Aba Asibon<sup>1</sup>; Samuel Ngwala<sup>1</sup>; Elizabeth  
5 Molyneux<sup>3</sup>; Maria Oden<sup>1,2</sup>; Rebecca Richards-Kortum<sup>1,2\*</sup>; Kondwani Kawaza<sup>3</sup>; Alfred Chalira<sup>4</sup>;  
6 Norman Lufesi<sup>4</sup>

7

8 <sup>1</sup>Rice360 Institute for Global Health, Houston, TX

9 <sup>2</sup>Department of Bioengineering, Rice University, Houston, TX

10 <sup>3</sup>Department of Paediatrics, College of Medicine, Queen Elizabeth Central Hospital, Blantyre,  
11 Malawi

12 <sup>4</sup>Malawi Ministry of Health, Department of Clinical Services, Lilongwe, Malawi

13

14 \*Corresponding author

15 E-mail: [rkortum@rice.edu](mailto:rkortum@rice.edu) (RK)

## 16 **Abstract**

17 Introduction: From 2013-2015, a CPAP quality improvement program (QIP) was implemented  
18 to introduce and monitor CPAP usage and outcomes in the neonatal wards at all government  
19 district and central hospitals in Malawi. In 2016 the CPAP QIP was extended into healthcare  
20 facilities operated by the Christian Health Association of Malawi. Although clinical outcomes  
21 improved, ward assessments indicated that many rural sites lacked other essential equipment and  
22 a suitable space to adequately treat sick neonates, which likely limited the impact of improved  
23 respiratory care. The aim of this study was to determine if a ward strengthening program  
24 improved outcomes for neonates treated with CPAP.

25 Methods: To address the needs identified from ward assessments, a ward strengthening program  
26 was implemented from 2017-2018 at rural hospitals in Malawi to improve the care of sick  
27 neonates. The ward strengthening program included the distribution of a bundle of equipment,  
28 supplemental training, and, in some cases, health facility renovations. Survival to discharge was  
29 compared for neonates treated with CPAP at 12 rural hospitals for one year before and for one  
30 year immediately after implementation of the ward strengthening program.

31 Results: In the year prior to ward strengthening, 189 neonates were treated with CPAP; in the  
32 year after, 232 neonates received CPAP. The overall rate of survival for those treated with CPAP  
33 improved from 46.6% to 57.3% after ward strengthening ( $p=0.03$ ). For the subset of neonates  
34 with admission weights between 1.00 – 2.49 kg diagnosed with respiratory distress syndrome,  
35 survival increased from 39.4% to 60.3% after ward strengthening ( $p=0.001$ ).

36 Conclusion: A ward strengthening program including the distribution of a bundle of equipment,  
37 supplemental training, and some health facility renovations, further improved survival among  
38 neonates treated with CPAP at district-level hospitals in Malawi.

## 39 **Introduction**

40 Globally, 85% of neonatal deaths are attributed to complications from prematurity and low  
41 birthweight, intrapartum-related hypoxia, and infection [1]. Neonates with these complications  
42 are particularly susceptible to respiratory distress, thermal instability, infection, jaundice, and  
43 hypoglycaemia [2]. Although delivery in a health facility can reduce the risk of neonatal  
44 mortality by 29% in low and middle income countries [3], facilities must have the infrastructure,  
45 capacity, and resources to treat small and sick neonates for such reductions in mortality to be  
46 realized [4,5]. Healthcare facilities must be able to provide neonatal care (service availability)  
47 through the presence of essential infrastructure, functioning equipment, supplies, medicine,  
48 trained staff, and current care guidelines (service readiness) [5]

49 Over 91% of deliveries in Malawi occur in a health facility [6]. However, improvements are  
50 needed in health facility service availability and service readiness to provide level-2 neonatal  
51 care [7], particularly in rural areas where 83% of Malawi's population live [8] and where 85% of  
52 healthcare facilities in Malawi are located [5].

53 To address limitations in the capacity to treat neonates with respiratory distress, a quality  
54 improvement program (QIP) for neonatal care in Malawi was implemented in 2013-2015 to  
55 introduce the use of bubble Continuous Positive Airway Pressure (CPAP) at all government  
56 district and central hospitals in Malawi [9]. In 2016 the CPAP QIP was extended to 8 healthcare  
57 facilities operated by the Christian Health Association of Malawi (CHAM), the largest non-

58 governmental healthcare provider and trainer of healthcare providers in Malawi. Equipment to  
59 support respiratory care (CPAP machines, oxygen concentrators, suction machines, pulse  
60 oximeters, all necessary disposable supplies, a storage cabinet, and wall job aids) was installed;  
61 training on how to use equipment was conducted and supportive supervision and mentorship  
62 were provided [10,11]. This was followed by a reduction in neonatal mortality, especially that  
63 caused by Respiratory Distress Syndrome (RDS) [9]. However, after conducting detailed needs  
64 assessments at each facility, it became increasingly clear that many neonatal units in rural areas  
65 lacked other essential equipment and infrastructure, and that further mortality reductions could  
66 only be achieved by taking a broader view of the overall challenges experienced by district-level  
67 hospitals. Therefore, in 2017-2018, a ward-strengthening program was implemented to provide a  
68 bundle of neonatal care services in a dedicated, well equipped clinical space with training and  
69 mentorship extended to all relevant hospital technicians and maintenance staff, as well as clinical  
70 staff. The aim of this study was to determine if the ward strengthening program improved  
71 outcomes for neonates treated with CPAP at these facilities. Here, we describe the process and  
72 outcome of this ward strengthening program.

## 73 **Methods**

### 74 **Needs Assessments**

75 In response to the challenges experienced during the CPAP QIP, detailed neonatal ward  
76 assessments were done in 2017 at all government district hospitals and CHAM facilities to  
77 determine specific challenges and limitations at each site. These assessments documented  
78 demand and capacity (number of monthly admissions, number of beds, dimensions of neonatal  
79 unit), staffing levels (number of nurses and doctors allocated to the neonatal unit or shared

80 between units), and equipment inventory (functioning and non-functioning equipment allocated  
81 to the neonatal unit). Facilities lacking essential equipment and/or suitable space for a neonatal  
82 unit were selected for inclusion in a ward strengthening program.

83 We also assessed neonatal training programs at fifteen institutions that train nurses and  
84 clinicians to ensure sustainability in the transfer of knowledge and skills. The assessment  
85 showed that, despite the presence of neonatal care concepts in training curricula at all  
86 institutions, there were gaps in teaching these concepts, particularly due to poorly furnished  
87 skills labs. All fifteen training institutions were included in a program to strengthen skills labs  
88 for neonatal care.

## 89 **Ward Strengthening Program**

90 From 2017-2018, a ward strengthening program was implemented at 12 government district  
91 hospitals and CHAM facilities to improve the care of sick neonates. Ward strengthening  
92 activities included the distribution of a bundle of equipment (Table 1), supplemental training  
93 support, and, in some cases, health facility renovations (Table 2).

94

95

96 **Table 1. Equipment bundle and quantity by number of beds**

| <b>Item</b>                 | <b>Quantity</b>                           |
|-----------------------------|-------------------------------------------|
| CPAP devices*               | 2 per unit                                |
| Phototherapy lights         | 1 per 10 cots                             |
| Radiant warmer              | 1 per 10 cots                             |
| Glucometer                  | 2 per unit                                |
| Glucometer sticks (50/pack) | 3 per unit                                |
| Ambu Bag                    | 1 per unit + 1 per 10 cots, 2 sizes       |
| Room heater                 | 2 per unit                                |
| Room thermometer            | 1 per unit + 1 in Labour Ward and Theater |
| Baby thermometer            | 3 per unit                                |
| Oxygen concentrator         | 1 per unit + 1 per 10 cots                |
| Flow splitter               | 1 per concentrator                        |
| Digital scale               | 1 per unit                                |
| Suction machines            | 1 per unit                                |
| Surge protector             | 1 for all electrical equipment            |
| Pulse oximeter              | 1 per ward + 1 spare                      |

\* Provided prior to ward strengthening

97

98 **Table 2. Summary of Renovations by Facility**

| <b>Hospital</b> | <b>Ward Strengthening Activities</b>  | <b>Completion of Ward Strengthening</b> | <b>Bed Capacity of New Unit</b> | <b>No. of Staff trained</b> |
|-----------------|---------------------------------------|-----------------------------------------|---------------------------------|-----------------------------|
| A               | Renovation and Equipment Installation | 11/2017                                 | 23                              | 20                          |
| B               | Renovation and Equipment Installation | 10/2017                                 | 15                              | 21                          |
| C               | Renovation and Equipment Installation | 7/2017                                  | 29                              | 20                          |
| D               | Renovation and Equipment Installation | 11/2017                                 | 23                              | 20                          |
| E               | Renovation and Equipment Installation | 11/2017                                 | 20                              | 20                          |
| F               | Renovation and Equipment Installation | 1/2018                                  | 11                              | 21                          |
| G               | Renovation and Equipment Installation | 11/2017                                 | 20                              | 21                          |
| H               | Renovation and Equipment Installation | 1/2018                                  | 23                              | 37                          |
| I               | Equipment installation only           | 8/2017                                  | -                               | 21                          |
| J               | Renovation and Equipment Installation | 11/2017                                 | 23                              | 19                          |
| K               | Renovation and Equipment Installation | 8/2017                                  | 14                              | 19                          |
| L               | Equipment installation only           | 8/2017                                  | -                               | 15                          |

99

100

101

102 Ten of the 12 facilities lacked a separate or suitable neonatal unit. At these sites, the facility  
103 management team worked with the Ministry of Health (MOH) to identify a room or space for  
104 renovation, quantify material needs for the renovation, obtain quotations for the materials, and  
105 develop a renovation work plan. Renovations varied by facility, but generally included the  
106 expansion or partitioning of an existing space, plumbing installation and repairs, installation of  
107 lighting and electrical sockets, roofing and ceiling installation and repairs, and painting. For  
108 nine of the ten sites where renovations were completed, renovation costs ranged from \$1,300 -  
109 \$8,600 USD and were covered by project funds. At the remaining site, the cost of construction of  
110 a new ward (\$38k USD) was supplemented by private donor funds.

111 At each site, equipment was distributed according to the bed capacity of the unit (Table 1); for a  
112 unit with 20 cots the bundle of equipment was approximately \$14k USD. Before equipment  
113 installation, clinical staff and biomedical technicians completed half-day user training courses to  
114 ensure familiarity with the operation, troubleshooting and maintenance of the equipment. These  
115 trainings were conducted with the Ministry of Health Physical Asset Management (PAM) units  
116 to allow biomedical technicians to receive training as well as assist with the instruction and  
117 installation process at each site. Costs associated with trainings included travel costs for the  
118 instructors and per diems for the trainees. The number of staff trained at each facility is  
119 summarized in Table 2.

120 In collaboration with the Paediatric and Child Health Association of Malawi (PACHA), training  
121 of the nurses and clinicians was delivered at the facilities using the Care of the Infant and  
122 Newborn (COIN) course. The COIN course, which is used nationally, focuses on diagnosis and  
123 triage of sick neonates, care at birth for all neonates, neonatal resuscitation, routine postnatal

124 care of the neonate, emergency assessment and treatment of neonates, and identification of  
125 neonates in need of referral and safe transport [12].

126 After the completion of the ward strengthening program, follow-up ward assessments were  
127 completed at each healthcare facility. The follow-up ward assessments were compared to those  
128 conducted prior to the ward strengthening program to evaluate changes in demand, capacity, and  
129 staffing levels.

### 130 **Program to Strengthen Skills Labs for Neonatal Care**

131 Fifteen health training institutions received support to establish skills labs for neonatal care,  
132 including equipment and teaching materials to facilitate hands-on teaching of essential skills in  
133 the care of neonates. Materials provided included training models, oxygen concentrators,  
134 glucometers, CPAP machines, suction machines, phototherapy lights, and teaching aids.  
135 Academic staff from these institutions also received training to encourage use of these resources  
136 within their institutions.

### 137 **Study Setting**

138 The impact of the ward strengthening program was evaluated at 12 district and CHAM hospitals  
139 located in rural areas (Table 2) where CPAP was being used to treat respiratory distress for one  
140 year before, and one year after the implementation of the ward strengthening program. All  
141 neonates with known outcomes (i.e. died or survived to discharge) treated with CPAP for  
142 respiratory distress at each facility were included in this analysis. Clinical diagnoses were made  
143 in accordance with national guidelines for newborn care in Malawi [12]. Because gestational  
144 age is often unknown in our setting, a simple, validated algorithm using a combination of vital



145 signs, tone and birth weight was implemented to assist nurses in determining the need for CPAP  
146 [13,14]. As previously described [9], patient details including dates of birth and admission,  
147 admission weight, discharge diagnosis, and outcome were collected from Acute Respiratory  
148 Illness (ARI) forms for each neonate admitted with respiratory illness. An on-site ARI  
149 coordinator ensured completion of forms for every qualifying patient. De-identified ARI forms  
150 were scanned monthly, and quarterly chart audits were conducted by the MOH ARI team to  
151 ensure completion of ARI forms for all patients. Patient data and survival data were compared  
152 for neonates treated before and after ward strengthening. Neonates with unknown outcomes,  
153 including those that left against medical advice or were transferred to another facility, were  
154 excluded from analysis. Rate of survival was defined as the fraction of eligible neonates with  
155 known outcomes who survived to discharge.

## 156 **Statistical Analysis**

157 Differences in transfer rates and survival before and after ward strengthening were compared  
158 using a two-sided Fisher's exact test. Differences between continuous variables (i.e., weight and  
159 age on admission) were assessed using a two-sided t-test for equality of means (unequal  
160 variances assumed). Results were considered significant at the 5% level. Data were analyzed in  
161 Excel.

## 162 **Ethics statement**

163 The protocol was approved by the National Health Sciences Research Committee (NHSRC  
164 #1180) of Malawi and the Institutional Review Board of Rice University (13-102X). De-  
165 identified patient information was collected from standard Ministry of Health Acute  
166 Respiratory Illness forms.

## 167 **Results**

168 Table 3 summarizes the patient data, outcomes, and survival rates for neonates treated with  
169 CPAP one year before and after ward strengthening. A total of 207 neonates were treated with  
170 CPAP before ward strengthening, and 254 were treated after ward strengthening. Among  
171 neonates with known outcomes, 189 were treated with CPAP before ward strengthening, and  
172 232 were treated with CPAP after ward strengthening. There was no significant difference in the  
173 number of neonates who transferred out of these facilities before and after ward strengthening,  
174 and there was no significant difference in the number of neonates who left against medical  
175 advice before and after ward strengthening. There were no significant differences in the rates of  
176 diagnosis of birth asphyxia, RDS, pneumonia, and meconium aspiration before and after ward  
177 strengthening. The percentage of neonates with known outcomes and a final diagnosis of sepsis  
178 significantly decreased after ward strengthening (12.2% vs 4.7%,  $p=0.01$ ).

179

180 **Table 3: Patient data for neonates treated with CPAP for one year before and after ward**  
 181 **strengthening**

182  
 183  
 184

|                                                                        | Before Ward<br>Strengthening | After Ward<br>Strengthening | p-value      |
|------------------------------------------------------------------------|------------------------------|-----------------------------|--------------|
| <b>Number of Study Participants</b>                                    | 207                          | 254                         |              |
| <b>Outcome</b>                                                         |                              |                             |              |
| Died                                                                   | 48.8%                        | 39.0%                       | <b>0.038</b> |
| Discharged                                                             | 42.5%                        | 52.4%                       | <b>0.039</b> |
| Transferred                                                            | 5.3%                         | 3.5%                        | 0.368        |
| Left AMA                                                               | 3.4%                         | 3.9%                        | 0.809        |
| Unknown                                                                | 0.0%                         | 1.2%                        | 0.256        |
| <b>Number of Neonates With<br/>Known Outcome<br/>(Died/Discharged)</b> |                              |                             |              |
|                                                                        | 189                          | 232                         |              |
| <b>Outcome</b>                                                         |                              |                             |              |
| Died                                                                   | 53.4%                        | 42.67%                      | <b>0.031</b> |
| Discharged                                                             | 46.6%                        | 57.33%                      | <b>0.031</b> |
| <b>Diagnosis*</b>                                                      |                              |                             |              |
| Birth Asphyxia                                                         | 15.9%                        | 9.9%                        | 0.077        |
| RDS                                                                    | 68.8%                        | 66.8%                       | 0.677        |
| Pneumonia                                                              | 9.5%                         | 9.1%                        | 0.868        |
| Meconium Aspiration                                                    | 5.3%                         | 4.7%                        | 0.825        |
| Sepsis                                                                 | 12.2%                        | 4.7%                        | <b>0.007</b> |
| No Diagnosis                                                           | 1.6%                         | 1.7%                        | 1.000        |
| <b>Admission Weight</b>                                                |                              |                             |              |
| <1.00 kg                                                               | 5.8%                         | 3.45%                       | 0.345        |
| 1.00-1.49 kg                                                           | 37.0%                        | 40.5%                       | 0.483        |
| 1.50-1.99 kg                                                           | 23.3%                        | 23.3%                       | 1.000        |
| 2.00-2.49 kg                                                           | 9.0%                         | 11.2%                       | 0.519        |
| 2.50-4.00 kg                                                           | 21.7%                        | 16.8%                       | 0.214        |
| >4.00 kg                                                               | 1.1%                         | 1.7%                        | 0.695        |
| Unknown                                                                | 2.1%                         | 3.0%                        | 1.000        |
| <b>Admission Temperature</b>                                           |                              |                             |              |
| <32.0 °C                                                               | 0.0%                         | 0.86%                       | 0.504        |
| 32.0-34.4 °C                                                           | 22.8%                        | 24.6%                       | 0.730        |
| 34.5-35.4 °C                                                           | 16.9%                        | 23.7%                       | 0.092        |
| 35.5-36.4 °C                                                           | 27.5%                        | 21.6%                       | 0.171        |
| 36.5-37.5 °C                                                           | 13.8%                        | 13.4%                       | 1.000        |
| >37.5 °C                                                               | 7.9%                         | 7.8%                        | 1.000        |
| Unknown                                                                | 11.1%                        | 8.2%                        | 0.321        |

185 \*Some neonates received multiple diagnoses

186

187 Following implementation of the ward strengthening program, there was a significant increase in  
188 survival for neonates treated with CPAP (Fig 1A), for the subset of neonates treated with CPAP  
189 weighing between 1.00 – 2.49 kg on admission and diagnosed with respiratory distress syndrome  
190 (RDS) (Fig 1B), as well as for the subset of neonates treated with CPAP weighing between 1.00  
191 – 1.49 kg on admission and diagnosed with respiratory distress syndrome (RDS) (Fig 1C).  
192 Before ward strengthening, 46.6% of neonates treated with CPAP survived to discharge; the rate  
193 of survival improved to 57.3% after ward strengthening ( $p=0.03$ ). Survival was also compared in  
194 the subset of low birth weight neonates diagnosed with RDS and weighing 1.00 – 2.49 kg and  
195 1.00 – 1.49 kg on admission; in these groups, survival increased from 39.4% before ward  
196 strengthening to 60.3% after ward strengthening ( $p=0.001$ ), and from 25.0% before ward  
197 strengthening to 44.3% after ward strengthening ( $p=0.03$ ).

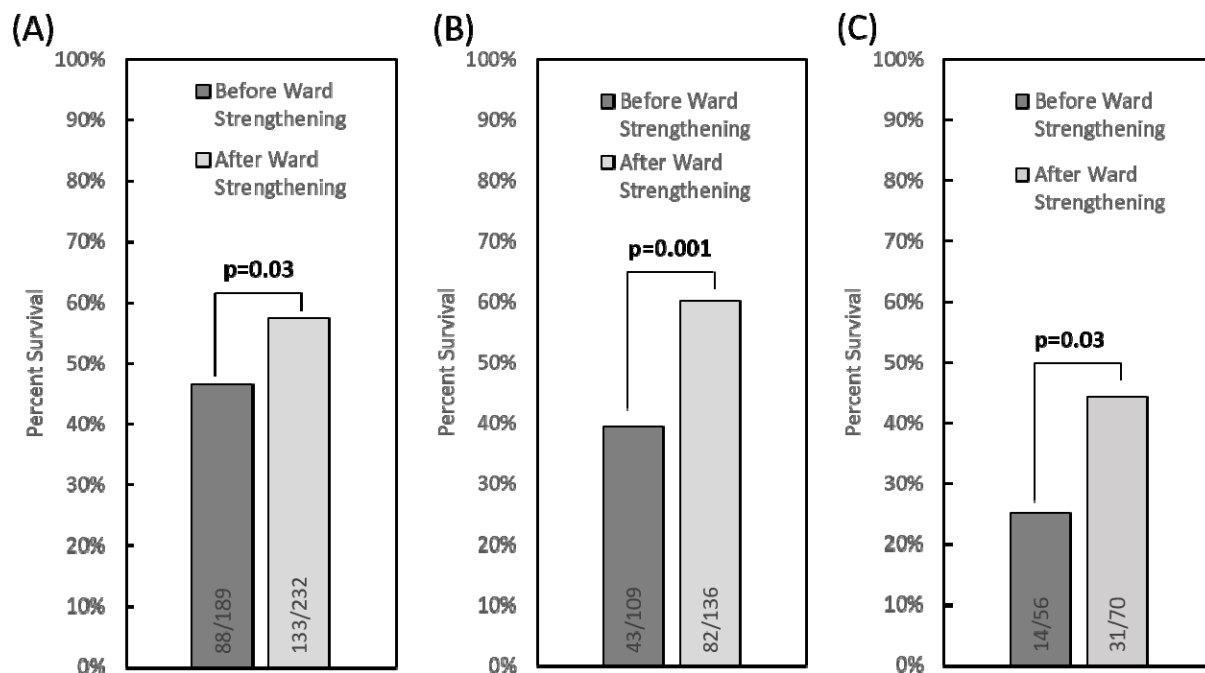

198  
199 **Fig 1.** (A) Outcomes for all neonates admitted with respiratory distress and treated with CPAP  
200 for one year before and after ward strengthening. There was a significant increase in survival

201 after ward strengthening (46.6% and 57.3%, respectively,  $p=0.03$ ). (B) Outcomes for the subset  
 202 of neonates treated with CPAP weighing between 1.00 – 2.49 kg on admission and diagnosed  
 203 with respiratory distress syndrome (RDS). There was a significant increase in survival after ward  
 204 strengthening (39.4% and 60.3%, respectively,  $p=0.001$ ). (C) Outcomes for the subset of  
 205 neonates treated with CPAP weighing between 1.00 – 1.49 kg on admission and diagnosed with  
 206 respiratory distress syndrome (RDS). There was a significant increase in survival after ward  
 207 strengthening (25.0% and 44.3%, respectively,  $p=0.03$ ).

208 The admission weights, admission temperatures, and age on admission for neonates treated  
 209 before and after ward strengthening are compared in Table 4. Results are shown for all neonates  
 210 treated with CPAP, and for the subset with admission weights between 1.00 – 2.49 kg and  
 211 diagnosed with RDS. There were no significant differences in the distribution of patient  
 212 variables before and after ward strengthening, with the exception of a decrease in mean  
 213 admission temperature for neonates weighing between 1.00 – 2.49 kg with a diagnosis of RDS ( $p$   
 214 = 0.01).

215 **Table 4: Comparison of average weights, temperatures, and age on admission for neonates**  
 216 **treated one year before and after ward strengthening.**

|                                             | All Admission Weights        |                             |             | Admission Weights 1-2.49 kg,<br>Diagnosed with RDS |                             |             |
|---------------------------------------------|------------------------------|-----------------------------|-------------|----------------------------------------------------|-----------------------------|-------------|
|                                             | Before Ward<br>Strengthening | After Ward<br>Strengthening | p-<br>value | Before Ward<br>Strengthening                       | After Ward<br>Strengthening | p-<br>value |
| Average<br>Admission<br>Weight (kg)         | 1.84 +/- 0.81                | 1.84 +/- 0.96               | 0.99        | 1.48 +/-0.34                                       | 1.48 +/-0.34                | 0.87        |
| Average<br>Admission<br>Temperature<br>(°C) | 35.5 +/- 1.6                 | 35.4 +/- 1.6                | 0.48        | 35.4 +/- 1.5                                       | 34.9 +/- 1.3                | <b>0.01</b> |

|                                |             |             |      |             |             |      |
|--------------------------------|-------------|-------------|------|-------------|-------------|------|
| Average Age on Admission (day) | 2.0 +/- 5.1 | 2.1 +/- 5.9 | 0.75 | 0.7 +/- 3.1 | 0.4 +/- 2.1 | 0.48 |
|--------------------------------|-------------|-------------|------|-------------|-------------|------|

217  
 218 Table 5 compares observations from the initial ward assessments completed in 2017 to the  
 219 follow-up ward assessments completed in 2018. These assessments indicated that admissions  
 220 increased and staffing levels improved following ward strengthening. Overall, average nursery  
 221 admissions at the 12 facilities included in this analysis increased from 39.2 neonates per month  
 222 in 2017 to 74.9 neonates per month in 2018. Additionally, the total number of nurses allocated  
 223 specifically for neonatal care across these facilities increased for both the day and night shifts.  
 224 Overall, the median number of nurses allocated specifically to care for neonates during the day  
 225 increased from 1 to 1.5, and the median number of nurses allocated to neonatal care overnight  
 226 increased from 0.5 to 1. The number of hospitals with no nurses allocated specifically to care for  
 227 neonates during the day remained the same before and after ward strengthening (3 hospitals); the  
 228 number of hospitals with no nurses allocated specifically to care for neonates during the night  
 229 decreased from 6 to 3. At the conclusion of this program, at least one clinician was assigned to  
 230 every neonatal ward included in this analysis.

231  
 232 **Table 5: Comparison of ward assessments for average monthly admissions and nurse**  
 233 **allocations before and after ward strengthening.**

|                                                                            | Before Ward Strengthening | After Ward Strengthening |
|----------------------------------------------------------------------------|---------------------------|--------------------------|
| Average Monthly Neonatal Admissions (min, max)                             | 39.2 (15, 70)             | 74.9 (15, 140)           |
| Median Number of Nurses Assigned to Neonatal Care (Day Shift) (min, max)   | 1 (0, 2)                  | 1.5 (0, 6)               |
| Median Number of Nurses Assigned to Neonatal Care (Night Shift) (min, max) | 0.5 (0, 1)                | 1 (0, 2)                 |

## 235 **Discussion**

236 We previously reported that implementation of a nurse-led CPAP QIP to treat neonates with  
237 respiratory illness in all government district and central hospitals in Malawi led to a significant  
238 increase in survival, particularly among neonates of low birth weight [9]. Following the CPAP  
239 QIP, survival for neonates with admission weights of 1.00 – 2.49 kg and diagnosed with RDS  
240 increased from 39.8% to 48.3% after the implementation of CPAP (p=0.042) [9]. However,  
241 improvements in survival fell short of those experienced during a previous quasi-randomized  
242 efficacy study of CPAP vs standard nasal oxygen in the neonatal unit of the referral hospital of  
243 southern Malawi, where neonates with admission weights of 1.00 – 2.49 kg and diagnosed  
244 with RDS experienced survival rates of 64.6% when treated with CPAP [15].

245 During mentorship and supervisory visits to rural and district hospitals, many challenges were  
246 identified that likely adversely affected overall survival as well as limited the impact of  
247 improved respiratory care. Despite provision of supportive respiratory equipment, training, and  
248 peer mentorship along with the CPAP devices, additional equipment, training, and space were  
249 necessary to allow more comprehensive care of vulnerable neonates, who often have other  
250 complications in addition to respiratory distress. After the ward strengthening program was  
251 introduced, survival rates for neonates weighing 1.00-2.49 kg with a diagnosis of RDS  
252 improved from 39.4% to 60.3%, approaching the 64.6% survival previously seen in a referral  
253 hospital [15].

254 To identify facility-level barriers to improved neonatal care, a needs assessment was undertaken  
255 in each hospital by members of their own administrative, clinical and technical/maintenance  
256 staff, together with MOH representatives. Together, MOH representatives and research staff

257 determined which parameters to evaluate; only parameters that directly impacted the quality of  
258 newborn care were prioritized to avoid burdening hospital staff and prevent disruption of work  
259 flow during the assessments. Since hospital staff were familiar with the parameters being  
260 evaluated, assessments were completed as part of routine visits to the facilities and no intensive  
261 training was required. Building modifications and equipment and staffing needs were thus  
262 directed by local requirements. Importantly, this gave ownership and investment to local hospital  
263 staff and in itself strengthened interdepartmental relationships.

264 The most common requirement was that of space. Ten of the twelve facilities did not have a  
265 separate neonatal ward; if a separate area was available, it was too small or otherwise unsuitable.  
266 The absence of a neonatal ward is common in hospitals in many countries [16,17]. As part of the  
267 Every Newborn Action Plan process, an analysis of 12 countries in Africa and Asia with the  
268 highest burden of neonatal mortality showed that five countries reported limited or no dedicated  
269 neonatal space in healthcare facilities [16]. A recent qualitative assessment of health facilities in  
270 three regions of Ethiopia from December 2017 to February 2018 found the lack of space for  
271 neonates in need of special care across all levels of the health care system [17]. This assessment  
272 found that neonates were sometimes relocated to adult and surgical wards due to the lack of  
273 space [17]. A dedicated space is essential for the provision of infection control and temperature  
274 control for small and sick neonates. Following the implementation of the ward strengthening  
275 program presented here, the proportion of neonates receiving CPAP who were diagnosed with  
276 sepsis decreased from 12.2% to 4.7%; further investigation is needed to determine if this  
277 decrease was a result of improved diagnoses or improved infection control.

278 The care of sick neonates also requires specialized training and skills. Neonatal nursing training  
279 programs are rare in low-income countries [16], and a high turnover of trained healthcare



280 providers is a problem in many settings [9,17]. We tried to address these barriers by conducting  
281 trainings not only at health facilities where equipment was installed, but also at 15 nursing  
282 schools and clinical officer training institutions. Most of the training institutions did not have the  
283 basic equipment necessary for practical instruction in neonatal care. Strengthening existing pre-  
284 service training programs is necessary to address the high staff turnover due to rotations and  
285 attrition.

286 We note that improved space, equipment, and training had important additional beneficial  
287 effects. Previously, sick and healthy neonates often remained with their mother in the postnatal  
288 ward, but the creation of a separate, well-equipped ward for sick neonates meant that staff were  
289 allocated specifically for their care; overall, nurse allocations to the neonatal wards increased and  
290 at least one clinician was assigned to the neonatal ward in each facility.

291 As this observational study involved neonates undergoing routine care in a low resource setting,  
292 there were some unavoidable limitations. The primary outcome of this study was survival to  
293 discharge as follow-up after discharge was not feasible. Few if any neonates had a chest x-ray to  
294 diagnose RDS, and gestational age as determined by a first trimester ultrasound was rarely  
295 available. Consequently, RDS was diagnosed clinically with the aid of an algorithm to help  
296 identify neonates who might benefit the most from CPAP. Although retinopathy of prematurity  
297 was addressed during trainings [11], we did not monitor for it during this study. However, in a  
298 review of reports from LMICs on the use of CPAP, two studies that looked for retinopathy of  
299 prematurity did not find it [18], and we did not encounter it in the early phases of our program  
300 [15]. Adverse events such as pneumothoraces and nasal trauma were also not tracked as part of  
301 this study, but anecdotally, they were uncommon and limited to nasal bleeds or nasal hyperemia.

302

## 303 **Learning from our experience**

304 When reflecting on our program, it is clear that efforts to improve the quality of neonatal care  
305 must be built on a solid foundation of good basic clinical care that is based on a holistic approach  
306 to the needs of a neonate. Improvement in one aspect of need (such as respiratory support) will  
307 falter without the provision of warmth, nutrition, infection control and family-centered care  
308 given by trained staff in a dedicated space. A needs assessment is essential to identify gaps in  
309 overall care so that these can be addressed with an appropriate bundle of interventions to  
310 improve care for all infants in the ward. Provision of materials is insufficient without training,  
311 supervision, and mentoring to ensure that equipment is used properly and protocols followed  
312 correctly.

313 Some challenges are beyond the jurisdiction of hospital management to solve: an unreliable  
314 power system and irregular water supply are common and affect many of the facilities included  
315 in this program. While power and water outages were not systematically tracked during this  
316 audit, power outages were noted on the charts of 16.4% of neonates treated before, and 15.9%  
317 treated after ward strengthening. Furthermore, availability of essential commodities and  
318 consumables is a challenge if hospitals lack the resources or ability to procure them.

319 It is encouraging to see that the physical changes made to the neonatal ward areas led to  
320 improved staff allocation to work in them. In initial discussions about possible space  
321 renovations, MOH representatives strongly advocated that each facility dedicate staff solely to  
322 planned new units to improve quality of care. Based on our observations, better staffing, more  
323 training and mentorship have improved morale, and by planning and creating the changes

324 together, the hospital departments are more interactive. All of these factors have played a part in  
325 reducing neonatal mortality.

## 326 **Conclusion**

327 To improve neonatal outcomes, healthcare facilities need the infrastructure, capacity, and  
328 resources to treat small and sick neonates. This means having a family-centred approach to care  
329 encompassing the provision of warmth, nutrition and infection control given by trained staff in a  
330 dedicated space with functioning equipment. Providing CPAP within such a framework  
331 significantly improved survival for neonates with respiratory distress. These improvements in  
332 service availability lead to improved staff morale, increased the number of dedicated neonatal  
333 staff, and most importantly, improved outcomes for admitted sick and small neonates treated  
334 with CPAP.

## 335 **Acknowledgments**

336 We would like to acknowledge PACHA (Paediatric and Child Health Association) for their  
337 leadership in the development and provision of the COIN training course. We would also like to  
338 acknowledge all of the staff of the CPAP Project for their contributions to data collection,  
339 monitoring, and training associated with the quality improvement initiative, as well as our CPAP  
340 trainers and mentors for leading CPAP training sessions and providing mentorship and  
341 supportive supervision within the hospitals.

## 342 **Contributors**

343 NL, AA, KK, RRK, MO, EM, and AA designed the study. JC, SLM, SN, and AA contributed to  
344 data collection and/or data and statistical analysis. JC, SLM, AA, and EM prepared the first draft

345 of the manuscript. All authors contributed to critical interpretation of the results and development  
346 of the manuscript and approved the final version.

## 347 **Funding**

348 This work is made possible through the generous support of ELMA Philanthropies through a  
349 grant to the University of Malawi College of Medicine (<https://www.elmaphilanthropies.org/>,  
350 Grant No. 16-F0007). This manuscript is also made possible through the generous support of the  
351 Saving Lives at Birth ([https://www.usaid.gov/global-health/health-areas/maternal-and-child-](https://www.usaid.gov/global-health/health-areas/maternal-and-child-health/projects/saving-lives-birth-a-grand-challenge)  
352 [health/projects/saving-lives-birth-a-grand-challenge](https://www.usaid.gov/global-health/health-areas/maternal-and-child-health/projects/saving-lives-birth-a-grand-challenge)) partners: The United States Agency for  
353 International Development (USAID), the Government of Norway, the Bill & Melinda Gates  
354 Foundation, Grand Challenges Canada, and the UKAID (Grant No. AID-OAA-A-13-00014). It  
355 was prepared by Rice University and does not necessarily reflect the views of the Saving Lives at  
356 Birth partners. Additionally, this work was supported by the John D. and Catherine T.  
357 MacArthur Foundation (<https://www.macfound.org>, Grant No. 17-1709-152484) the Bill &  
358 Melinda Gates Foundation (<https://www.gatesfoundation.org>, Grant No. OPP1193531), ELMA  
359 Philanthropies (<https://www.elmaphilanthropies.org>, Grant No. 19-F0012), The Children's  
360 Investment Fund Foundation UK (<https://ciff.org>, Grant No. R-1810-03159), The Lemelson  
361 Foundation (<https://www.lemelson.org>, Grant No. 18-01458), and the Ting Tsung and Wei Fong  
362 Chao Foundation under agreements to William Marsh Rice University.

363 References

- 364 1. World Health Organisation. Every Newborn Action Plan. 2014. Available:  
365 [www.who.int/about/licensing/copyright\\_form/en/index.html](http://www.who.int/about/licensing/copyright_form/en/index.html)
- 366 2. Maynard KR, Causey L, Kawaza K, Dube Q, Lufesi N, Maria Oden Z, et al. New technologies for  
367 essential newborn care in under-resourced areas: what is needed and how to deliver it. *Paediatr*  
368 *Int Child Health*. 2015;35: 192–205. doi:10.1179/2046905515Y.0000000034
- 369 3. Tura G, Fantahun M, Worku A. The effect of health facility delivery on neonatal mortality:  
370 systematic review and meta-analysis. *BMC Pregnancy Childbirth*. 2013;13: 18. doi:10.1186/1471-  
371 2393-13-18
- 372 4. Dickson KE, Simen-Kapeu A, Kinney M V, Huicho L, Vesel L, Lackritz E, et al. Every Newborn:  
373 health-systems bottlenecks and strategies to accelerate scale-up in countries. *Lancet*. 2014;384:  
374 438–454. doi:[https://doi.org/10.1016/S0140-6736\(14\)60582-1](https://doi.org/10.1016/S0140-6736(14)60582-1)
- 375 5. Winter R, Yourkavitch J, Wang W, Mallick L. Assessment of health facility capacity to provide  
376 newborn care in Bangladesh, Haiti, Malawi, Senegal, and Tanzania. *J Glob Health*. 2017;7: 20509.  
377 doi:10.7189/jogh.07.020509
- 378 6. National Statistical Office of Malawi. Malawi Demographic and Health Survey. *Natl Stat Off DHS*  
379 *Progr*. 2017; 1–658. doi:<http://www.measuredhs.com/>
- 380 7. WHO, UNICEF. Ending Preventable Newborn Deaths and Stillbirths by 2030. 2020.
- 381 8. The World Bank. Rural Population, Malawi. 2018. Available:  
382 <https://data.worldbank.org/indicator/SP.RUR.TOTL.ZS?locations=MW>
- 383 9. Carns J, Kawaza K, Liaghati-Mobarhan S, Asibon A, Quinn MK, Chalira A, et al. Neonatal CPAP for  
384 Respiratory Distress Across Malawi and Mortality. *Pediatrics*. 2019; e20190668.  
385 doi:10.1542/peds.2019-0668
- 386 10. Asibon A, Lufesi N, Choudhury A, Olvera S, Molyneux E, Oden M, et al. Using a peer mentorship  
387 approach improved the use of neonatal continuous positive airway pressure and related  
388 outcomes in Malawi. *Acta Paediatr*. 2019;n/a. doi:10.1111/apa.15025
- 389 11. NEST360 Clinical Modules. Available: <https://nest360.org/project/clinical-modules/>
- 390 12. Malawi Ministry of Health. Care of the infant and newborn in Malawi (2017): the COIN Course -  
391 Participants Manual. 2017. Available: [https://research-repository.st-  
392 andrews.ac.uk/handle/10023/12839](https://research-repository.st-andrews.ac.uk/handle/10023/12839)
- 393 13. Crehan C, Colbourn T, Heys M, Molyneux E. Evaluation of 'TRY': an algorithm for neonatal  
394 continuous positive airways pressure in low-income settings. *Arch Dis Child*. 2018;103: 732 LP –  
395 738. doi:10.1136/archdischild-2017-313867
- 396 14. Hundalani SG, Richards-Kortum R, Oden M, Kawaza K, Gest A, Molyneux E. Development and  
397 validation of a simple algorithm for initiation of CPAP in neonates with respiratory distress in  
398 Malawi. *Arch Dis Child - Fetal Neonatal Ed*. 2015;100: F332–F336. doi:10.1136/archdischild-2014-  
399 308082
- 400 15. Kawaza K, Machen HE, Brown J, Mwanza Z, Iniguez S, Gest A, et al. Efficacy of a low-cost bubble  
401 CPAP system in treatment of respiratory distress in a neonatal ward in Malawi. *PLoS One*. 2014;9.  
402 doi:10.1371/journal.pone.0086327

- 403 16. Moxon SG, Lawn JE, Dickson KE, Simen-Kapeu A, Gupta G, Deorari A, et al. Inpatient care of small  
404 and sick newborns: a multi-country analysis of health system bottlenecks and potential solutions.  
405 BMC Pregnancy Childbirth. 2015;15: S7. doi:10.1186/1471-2393-15-S2-S7
- 406 17. Usman AK, Wolka E, Tadesse Y, Tariku A, Yeshidinber A, Teklu AM, et al. Health system readiness  
407 to support facilities for care of preterm, low birth weight, and sick newborns in Ethiopia: a  
408 qualitative assessment. BMC Health Serv Res. 2019;19: 860. doi:10.1186/s12913-019-4672-2
- 409 18. Thukral A, Sankar MJ, Chandrasekaran A, Agarwal R, Paul VK. Efficacy and safety of CPAP in low-  
410 and middle-income countries. J Perinatol. 2016;36: S21. Available:  
411 <https://doi.org/10.1038/jp.2016.29>  
412
